# Supplementary material
Source: MDPI journal article supplement (https://www.mdpi.com/2311-7524/10/1/102)
Supplement: s1 [file s1]

**Supplementary Table S1.** Physical and chemical properties of the soil used for the greenhouse experiments.

|                                                                    |            |       |
|--------------------------------------------------------------------|------------|-------|
| sand (63 - 2.000 $\mu\text{m}$ )                                   | %          | 2.7   |
| silt (2 - 63 $\mu\text{m}$ )                                       | %          | 67.1  |
| clay (< 2 $\mu\text{m}$ )                                          | %          | 30.2  |
| water content (WC)                                                 | %          | 4.5   |
| water holding capacity (WHC)                                       | %          | 23    |
| pH-value, $\text{CaCl}_2$ -suspension                              |            | 7.1   |
| Carbonates, gas vol. after Scheibler                               | %          | 2     |
| Humus, elementary analysis ( $\text{C}_{\text{org}} \times 1.72$ ) | %          | 2.37  |
| Carbon total (C), elementary analysis                              | %          | 1.45  |
| Nitrogen (N), elementary analysis                                  | %          | 0.162 |
| Phosphorus (P), CAL-extract VDLUFA                                 | mg/kg      | 100   |
| Potassium (K), CAL-extract VDLUFA                                  | mg/kg      | 149   |
| Magnesium (Mg), $\text{CaCl}_2$ -extract VDLUFA                    | mg/kg      | 230   |
| Sulphur (S), elementary analysis                                   | mg/kg      | 250   |
| Base saturation (Co-hexamine VDLUFA)                               | %          | 74    |
| $\text{CAC}_{\text{pot}}$ (Co-hexamine VDLUFA)                     | cmol(c)/kg | 22    |
| Potassium (K) exchangeable (Co-hexamine)                           | cmol(c)/kg | 0.44  |
| Magnesium (Mg) exchangeable (Co-hexamine)                          | cmol(c)/kg | 2.38  |
| Calcium (Ca) exchangeable (Co-hexamine)                            | cmol(c)/kg | 13.5  |

Soil Analysis after: VDLUFA Methodenbuch 4. Auflage 1985 – 2020. VDLUFA-Verlag: Darmstadt, Germany.

**Supplementary Table S2.** Treatments, microbial strains and strain combinations used for experiment I.

| Variant No. | Treatments                                              |                                                                                                                          | Codes |
|-------------|---------------------------------------------------------|--------------------------------------------------------------------------------------------------------------------------|-------|
| <b>1</b>    | <b>negative control (drought stress non-inoculated)</b> |                                                                                                                          | NC    |
|             | <b>Single</b>                                           | <b>Microorganism (with code number)</b>                                                                                  |       |
| <b>2</b>    | C1                                                      | <i>Paraburkholderia phytofirmans</i> PsJN                                                                                | PsJN  |
| <b>3</b>    | C2                                                      | <i>Pseudomonas</i> sp. KCZ4-3                                                                                            | KCZ   |
| <b>4</b>    | C3                                                      | <i>Rhizophagus irregularis</i> MUCL 41833                                                                                | AM    |
| <b>5</b>    | C4                                                      | <i>Trichoderma asperelloides</i> A                                                                                       | TA    |
| <b>6</b>    | C5                                                      | <i>Pseudomonas brassicacearum</i> 3Re2-7                                                                                 | 3Re27 |
| <b>7</b>    | C6                                                      | <i>Bacillus amyloliquefaciens</i> FZB42 (Rhizovital)                                                                     | FZB   |
|             | <b>Combinations</b>                                     |                                                                                                                          |       |
| <b>8</b>    | I                                                       | <i>Pseudomonas protegens</i> 3BS, <i>P. jessenii</i> 17BS                                                                | PPS   |
| <b>9</b>    | II                                                      | <i>Kosakonia</i> sp. and <i>Herbaspirillum</i> sp.                                                                       | KH    |
| <b>10</b>   | III                                                     | <i>Kosakonia</i> sp. and <i>Herbaspirillum</i> sp., <i>Rhizophagus irregularis</i> MUCL 41833                            | KHR   |
| <b>11</b>   | IV                                                      | <i>Pseudomonas brassicacearum</i> 3Re2-7 + <i>Rhizophagus irregularis</i> MUCL 41833                                     | P&R   |
| <b>12</b>   | V                                                       | <i>Paraburkholderia phytofirmans</i> PsJN, <i>Rhizophagus irregularis</i> MUCL 41833                                     | PaR   |
| <b>13</b>   | VI                                                      | <i>Paraburkholderia phytofirmans</i> PsJN, <i>Trichoderma asperelloides</i> A                                            | PaT   |
| <b>14</b>   | VII                                                     | <i>Pseudomonas</i> sp. KCZ4-3 & <i>Rhizophagus irregularis</i> MUCL 41833                                                | P4R   |
| <b>15</b>   | VIII                                                    | <i>Pseudomonas brassicacearum</i> 3Re2-7 & <i>Trichoderma asperelloides</i> A                                            | PT    |
| <b>16</b>   | IX                                                      | <i>Rhizophagus irregularis</i> MUCL 41833, <i>Trichoderma asperelloides</i> A                                            | RT    |
| <b>17</b>   | X                                                       | <i>Paraburkholderia phytofirmans</i> PsJN, <i>Rhizophagus irregularis</i> MUCL 41833, <i>Trichoderma asperelloides</i> A | PaRT  |
| <b>18</b>   | <b>positive control (fully watered non-inoculated)</b>  |                                                                                                                          | PC    |

**Supplementary Table S3.** Optical density corresponding to  $10^7$  cfu ml<sup>-1</sup> for each bacterial inoculant strain (pure liquid TSM as blank to adjust the NanoDrop™ spectrophotometer).

| Bacterial strain                         | Target OD <sub>600</sub> |
|------------------------------------------|--------------------------|
| <i>Herbaspirillum</i> sp.                | 2.885                    |
| <i>Kasakonia</i> sp.                     | 0.084                    |
| <i>Pseudomonas jessenii</i> 17BS         | 0.457                    |
| <i>Parabukholderia phytofirmans</i> PsJN | 0.041                    |
| <i>P. brassicacearum</i> 3Re2-7          | 0.051                    |
| <i>Pseudomonas</i> sp. KCZ4-3            | 0.039                    |
| <i>Pseudomonas protegens</i>             | 0.100                    |

**Supplementary Table S4.** Treatments, microbial strains and strain combinations used for experiment II-.

| Variant No. | N form                       | Water        | Inoculants                                                          | Codes  |
|-------------|------------------------------|--------------|---------------------------------------------------------------------|--------|
| 1           | NO <sub>3</sub> <sup>-</sup> | Well-watered | non-inoculated                                                      | PC     |
| 2           |                              | Drought      | non-inoculated                                                      | NC     |
| 3           | NH <sub>4</sub> <sup>+</sup> | Well-watered | non-inoculated                                                      | PC     |
| 4           |                              | Drought      | non-inoculated                                                      | NC     |
| 5           |                              |              | <i>Rhizophagus irregularis</i> MUCL 41833                           | AM     |
| 6           |                              |              | <i>R. irregularis</i> MUCL 41833+ <i>P. brassicacearum</i> 3Re2-7   | AM+3Re |
| 7           |                              |              | <i>R. irregularis</i> MUCL 41833+ <i>Herbaspirillum</i> sp          | AM+Her |
| 8           |                              |              | <i>Bacillus amyloliquefaciens</i> FZB42                             | FZB    |
| 9           |                              |              | <i>R. irregularis</i> MUCL 41833+ <i>B. amyloliquefaciens</i> FZB42 | AM+FZB |

**Supplementary Table S5.** Formulation and dosage of PGPM strains in the field trial.

| <b>Strain</b>                             | <b>Formulation</b>                                        | <b>Quantity per tuber</b> | <b>Inoculation density per tuber</b> |
|-------------------------------------------|-----------------------------------------------------------|---------------------------|--------------------------------------|
| <i>Rhizophagus irregularis</i> MUCL41833  | Alginate beads                                            | 10 beads                  | ~100 spores                          |
| <i>Pseudomonas brassicacearum</i> 3Re2-7  | King B medium (diluted in 16l water prior to application) | 20ml                      | $2 \times 10^8$ CFU                  |
| <i>Paraburkholderia phytofirmans</i> PsJN | Lysogeny broth (diluted in 16l water for application)     | 20ml                      | $1 \times 10^8$ CFU                  |
| <i>Trichoderma asperelloides</i> A        | Dried (resuspended in 16l water for application)          | 20ml                      | $1.1 \times 10^6$ CFU                |

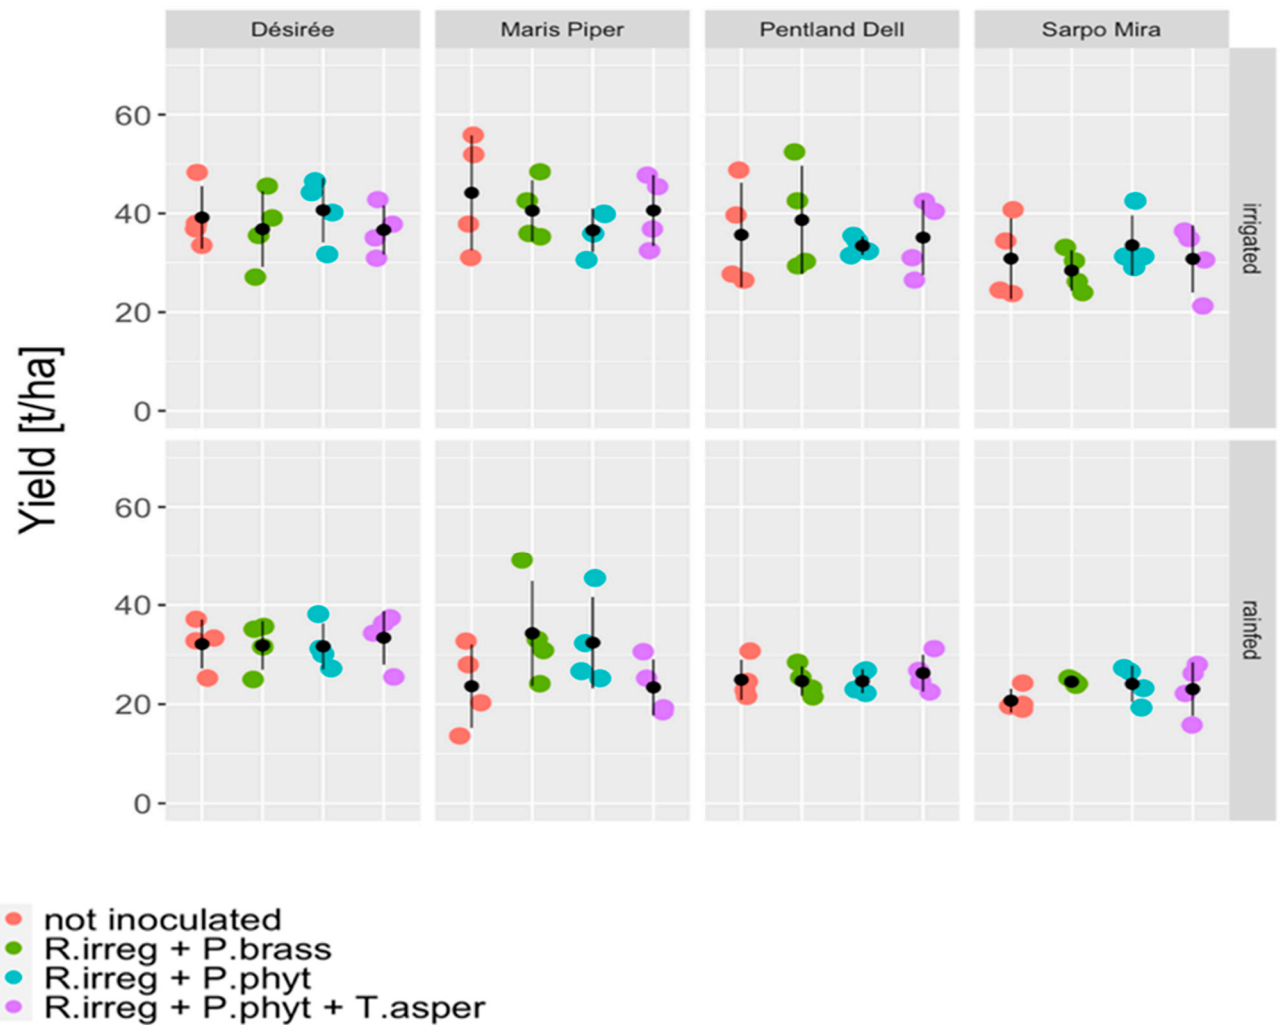

**Supplementary Figure S1.** Tuber yield, in tons per hectare, for the field trial conducted in Switzerland. Potato varieties are presented separately along the horizontal axis, while irrigated and rainfed treatments were split between top and bottom panels, respectively. Colours represent control (red) or inoculations of consortia (R.irreg = *Rhizophagus irregularis* MUCL 41833; P. brass = *Pseudomonas brassicacearum* 3Re2-7; P. phyt = *Paraburkholderia phytofirmans* PsJN; T. asper = *Trichoderma asperelloides* A).

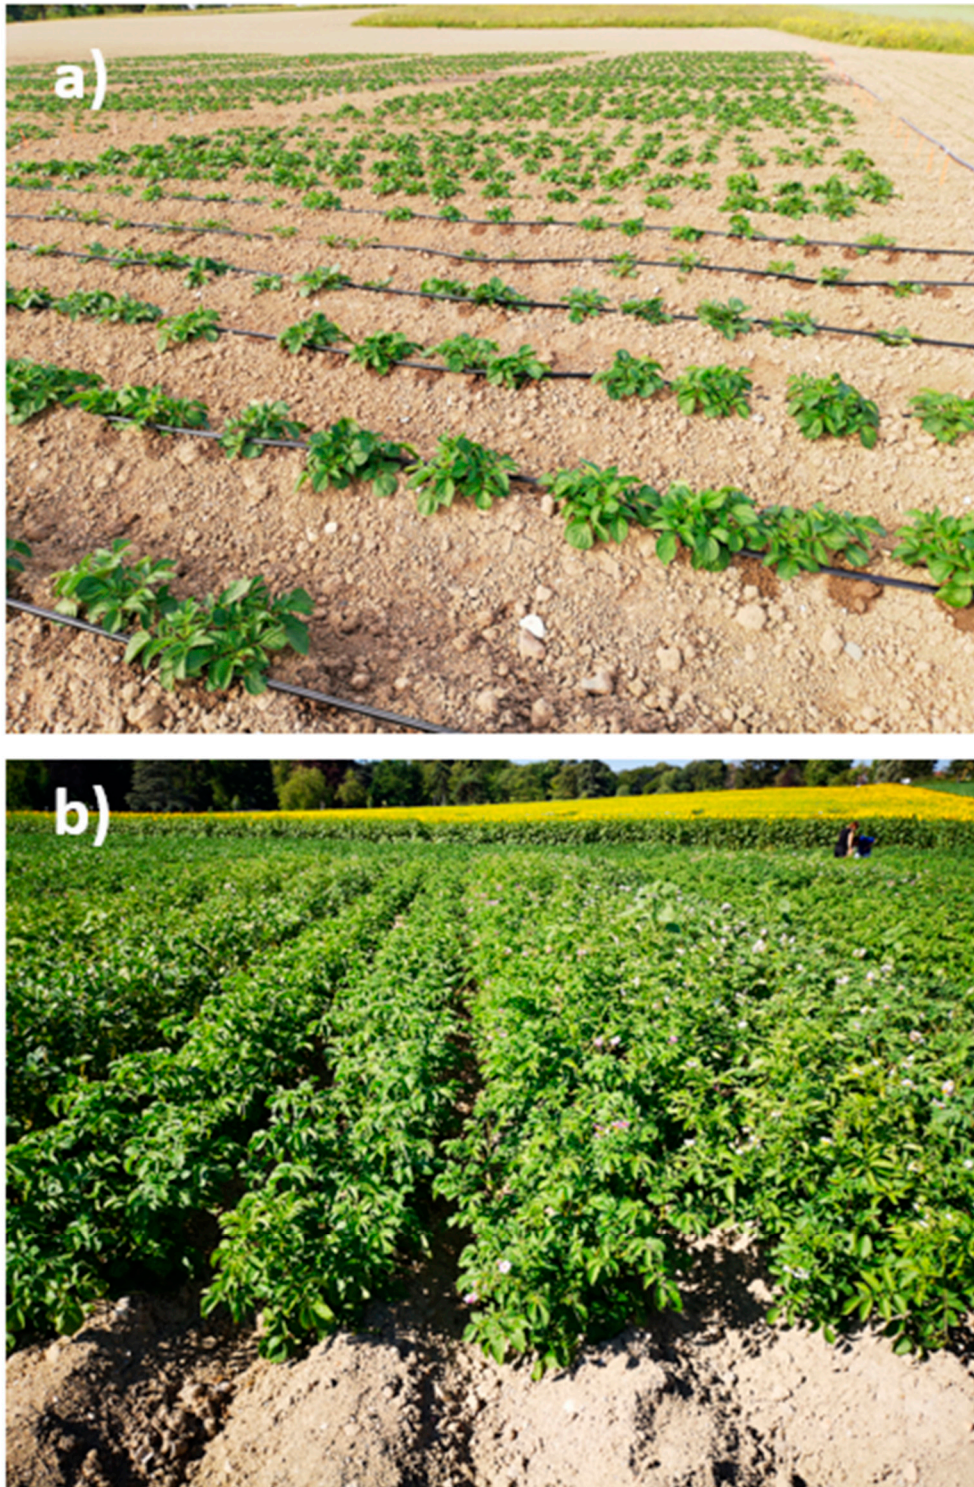

**Supplementary Figure S2.** The potato field experiment with drip irrigation vs rainfed conditions during early growth (a) and 45 days after planting (b).



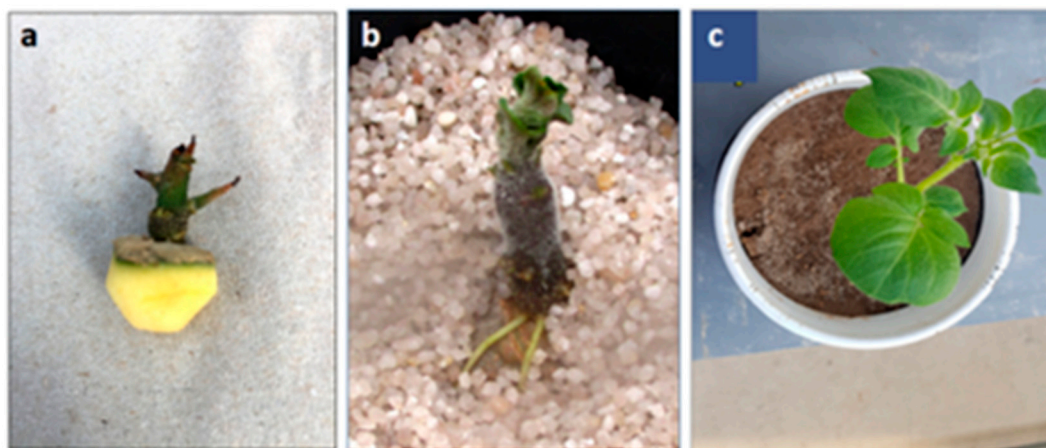

d) Well-watered - Leaf damage score 0-1

e) Drought-stressed - Leaf damage score 7-8

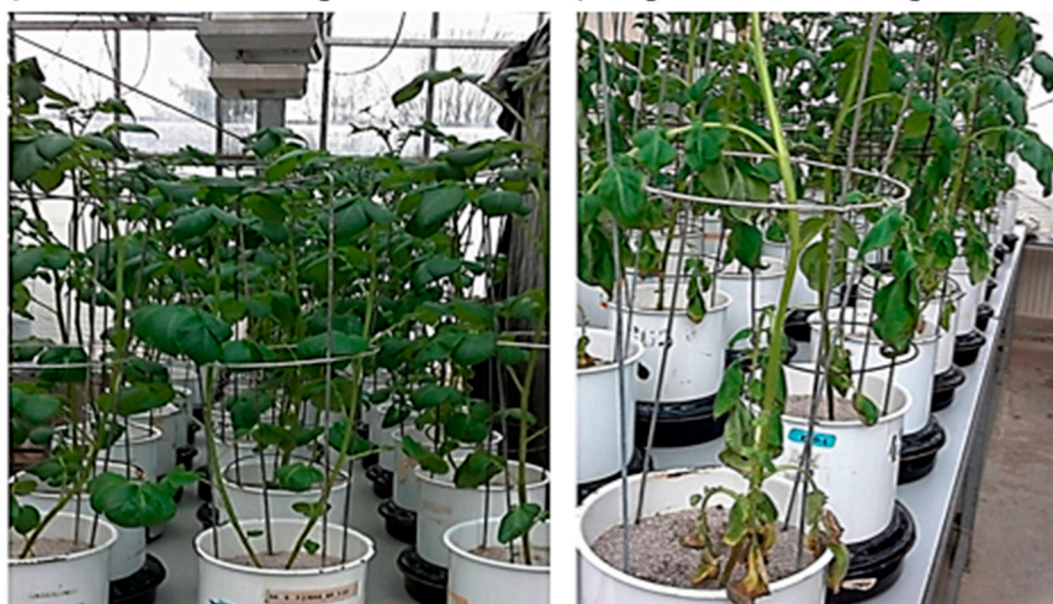

**Supplementary Figure S3.** Pot experiments: Regeneration of potato plants (cv Alonso) from tuber cuttings (a), rooting in planting substrate (b) and young potato plant in the 4-5 leaf stage used for soil drenching with inoculants (c). Potato plant at 9 weeks after sowing grown under well-watered conditions (d) and after 6 weeks of drought stress with 20-25 % substrate water-holding capacity (e).
